# Supplementary material for: Photothermal-responsive self-healing PDMS-based elastomers for stretchable strain sensors
Source: Royal Society of Chemistry journal article supplement (doi:10.1039/d6ra01474g), 2026-04-07
Supplement: d6ra01474g1.pdf [file d6ra01474g1.pdf]

## Supporting Information

# Photothermal-responsive self-healing PDMS-based elastomers for stretchable strain sensors

*Ruijie Zhu*<sup>a,b</sup>, *Ling Ai*<sup>b,c,\*</sup>, *Zhou Zhou*<sup>b</sup>, *Jie Gao*<sup>b</sup>, *Yuanlong Zhong*<sup>b</sup>, *Qi Zhang*<sup>b</sup>, *Weijie Song*<sup>b,c</sup>,

*d*, \*

<sup>a</sup> School of Materials Science and Engineering, Jiangxi University of Science and Technology,  
Ganzhou 341000, Jiangxi, China

<sup>b</sup> Laboratory of Optoelectronic Materials and Devices, Ningbo Institute of Materials Technology  
and Engineering, Chinese Academy of Sciences, Ningbo, 315201, People's Republic of China

<sup>c</sup> University of Chinese Academy of Sciences, Beijing, 100049, People's Republic of China

<sup>d</sup> Jiangsu Collaborative Innovation Center of Photovoltaic Science and Engineering, Changzhou,  
213164, People's Republic of China

\*Corresponding author: Ling Ai (E-mail: [ailing@nimte.ac.cn](mailto:ailing@nimte.ac.cn)); Weijie Song (E-mail:  
[weijiesong@nimte.ac.cn](mailto:weijiesong@nimte.ac.cn))

**\*Corresponding author:**

Ling Ai (E-mail: [ailing@nimte.ac.cn](mailto:ailing@nimte.ac.cn))

Weijie Song (E-mail: [weijiesong@nimte.ac.cn](mailto:weijiesong@nimte.ac.cn))

## Materials

Amino-capped polydimethylsiloxane (PDMS, Mw: 3000) was purchased from Shanghai Macklin Biochemical Co., Ltd; isophorone diisocyanate (IPDI, 99%), 4, 4'-Dithiodianiline(DTSA, 98%) was bought from Anhui Senrise Technologies Co., Ltd; 2, 4, 6, 8-tetramethyl-2, 4, 6, 8-tetrakis[3-(oxiranylethoxy) propyl] cyclotetrasiloxan (TEC, 97%) were provided from Zhengzhou Alfa Chemical Co., Ltd; tetrahydrofuran (THF), silver nanowires (AgNWs), and Dibutyltin dilaurate were provided from Shanghai Aladdin Biochemical Technology Co., Ltd; all of the reagents can be used without purification.

## Preparation of PUSE elastomer

First, H<sub>2</sub>N-PDMS-NH<sub>2</sub> (1.9, 1.8, and 1.7 mmol) was separately weighed into 20 mL sample vials and diluted with an appropriate amount of THF (15 mL). IPDI (4 mmol) was weighed and mixed with THF (15 mL). APDS (0.1, 0.2, and 0.3 mmol) was separately weighed and diluted with THF (5 mL). In addition, TEC (0.1 mmol) with a photoinitiator (5 uL, Triaryl selenonium hexafluoroantimonate solution 50wt% propylene carbonate solution) were diluted with THF (5 mL). Then, Under N<sub>2</sub> protection, the THF -diluted solutions of H<sub>2</sub>N-PDMS-NH<sub>2</sub>, IPDI, APDS and TEC were injected into a two-neck round-bottom flask using disposable syringes. The reaction mixture was heated to 60 °C and allowed to react for 24 h. Afterward, THF was removed, and the reaction was stirred at 60 °C for additional 6 h. Subsequently, the resulting reaction sol was poured into a 5 cm × 5 cm polytetrafluoroethylene (PTFE) mold and irradiated with a 365 nm UV lamp (80 W) for 2 h. After the elastomer surface became dry enough, the sample was transferred to a 60 °C oven and dried for 24 h, yielding the PUS<sub>1</sub>E, PUS<sub>2</sub>E, PUS<sub>3</sub>E elastomers (with different APDS content of 0.1, 0.2, and 0.3 mmol), respectively. And PUE<sub>X</sub> elastomers with different TEC content (X=0.1, 0.2, 0.3, 0.4, 0.5 mmol) and 2 mmol PDMS, were prepared by the same synthesis route and procedures as before, and PUE<sub>1</sub>, PUE<sub>2</sub>, PUE<sub>3</sub>, PUE<sub>4</sub>, PUE<sub>5</sub> were obtained, respectively.

## Preparation of PUSE/AgNWs elastomer

First, AgNWs were roll-coated onto a 4×7 cm glass substrate to obtain an AgNWs film with a sheet resistance below 10  $\Omega$ /sq. The roll-coated AgNWs film was then dried in an oven at 160 °C for 30 minutes. This step not only removed the excess ethanol dispersant but also helped to form a continuous silver nanowire network, thereby reducing the resistance. Next, PUSE sol was drop-coated onto the AgNWs film and cured under 365 nm, 80 W UV light in a vacuum oven. After the elastomer cured and formed a film, it was peeled off from the glass to obtain the PUSE/AgNWs composite conductive film. Copper tape was applied to both sides of the composite conductive film to form a simple strain sensor for subsequent testing.

## **Characterization method**

### **Fourier Transform Infrared Spectroscopy (FTIR)**

FTIR (Thermo Fisher NICOLET 6700) was used to characterize PDMS, IPDI, TEC, DTSA, PU, PUE and PUSE solution.

### **Thermodynamic Analysis (TGA, DSC)**

TGA analysis was conducted using a TG209F1 instrument, where the sample was heated from 30 °C to 800 °C at a ramp rate of 10 °C min<sup>-1</sup> under an N<sub>2</sub> atmosphere. DSC analysis was performed using a DSC214 instrument, where the temperature range was set from -150 °C to 100 °C at a ramp rate of 10 °C min<sup>-1</sup> under an N<sub>2</sub> atmosphere.

### **Optical Micrograph**

Images were captured using an industrial electron microscope TD-TZG5X-KHT instrument, at a magnification of 10x.

### **Surface Morphology Analysis**

Surface roughness analysis was conducted using a scanning probe microscope (model: 3100 SPM). Surface topography analysis was performed using a cold-field high-resolution scanning electron microscope (SEM).

### **Tensile Test**

The tensile test was conducted in accordance with GB/T 528-2009 (China) using

a 1 kN universal material testing machine. The PU, PUE, PUSE elastomer was prepared as a dumbbell-shaped sample with a length of 50 mm, width of 4 mm, and thickness of 2 mm. A tensile rate of 10 mm/min was applied. For tensile cycling tests, the sample was stretched to 10% and 100% strain at a rate of 10 mm/min, then returned to its initial position at the same rate of 10 mm/min.

### **Self-Healing Test**

Surface scratch experiments were conducted on the PUE, PUSE elastomer using a utility knife. After healing under various conditions, the recovery of the surface scratches was observed under an optical microscope. The original PUE, PUSE dumbbell-shaped sample was cut in half at the center, and the sample was healed under different conditions: room temperature, a 70 °C oven, and 365 nm, 80W UV light for 24 hours. Subsequently, the tensile strength of the healed samples was tested using the universal material testing machine, and the self-healing efficiency of the elastomer was calculated by the ratio of the maximum stress of the healed sample to the initial sample.

### **Electric Heating Test**

The PUSE/AgNWs conductive elastomer was subjected to an external voltage using a DC power supply. The surface temperature changes of the elastomer within a voltage range of 0.5 V to 3 V were measured using an infrared thermometer.

### **Human Motion Signal Monitoring**

Copper tape was applied to both ends of the PUSE/AgNWs conductive elastomer to form a simple strain sensor. This strain sensor was placed on the finger joints, wrist joints, and pulse, and the change in the resistance of the elastomer during various movements was tested using an electrochemical workstation.

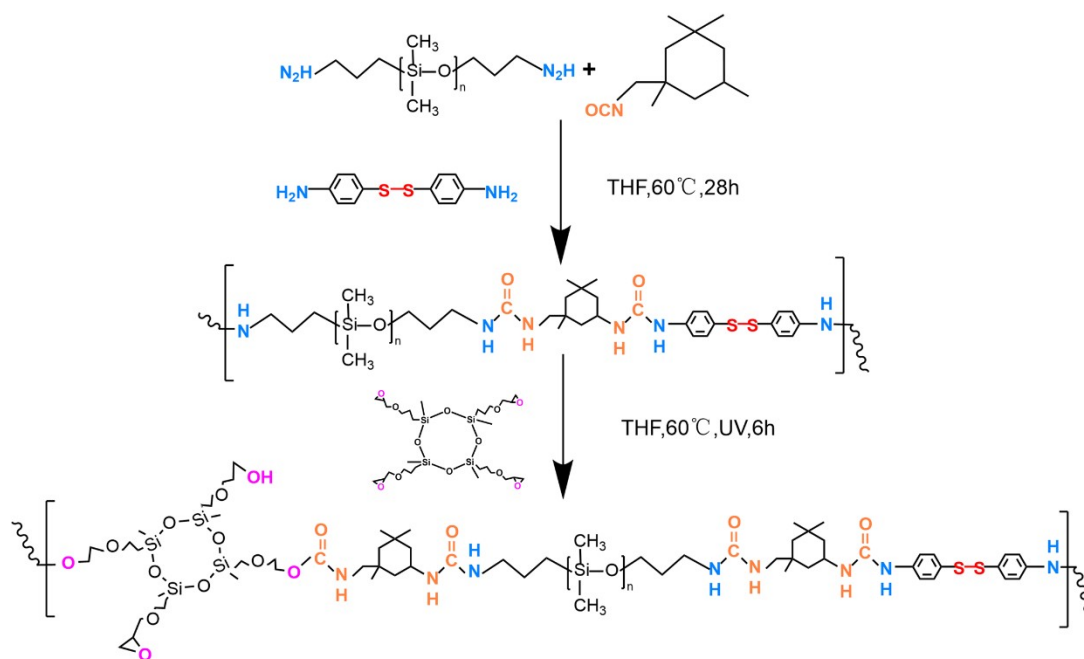

**Figure S1.** Synthesis route of PUSE.

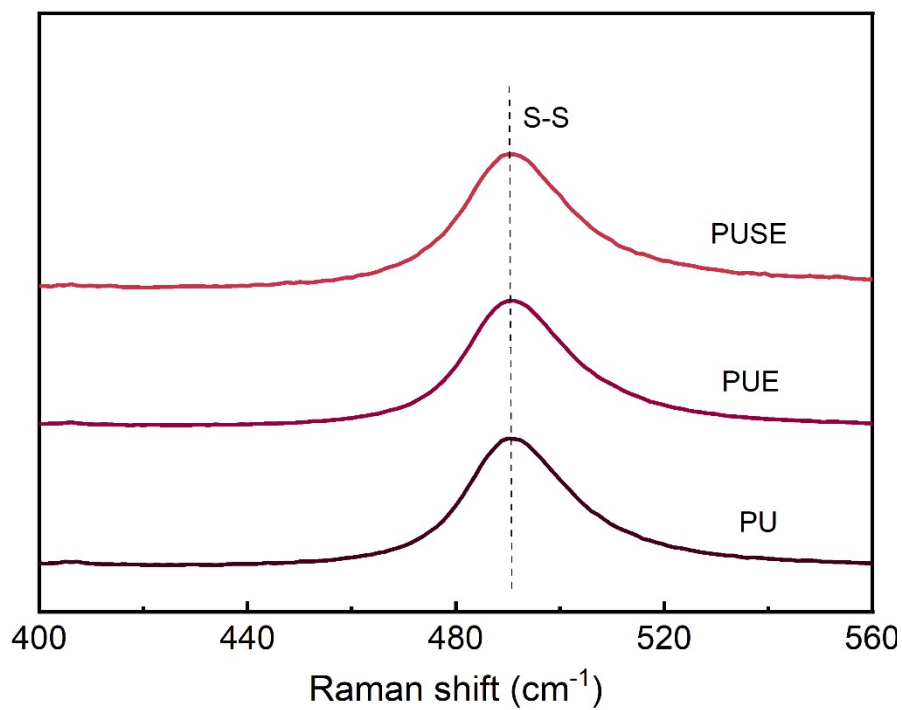

**Figure S2.** Raman spectrum of PUSE.

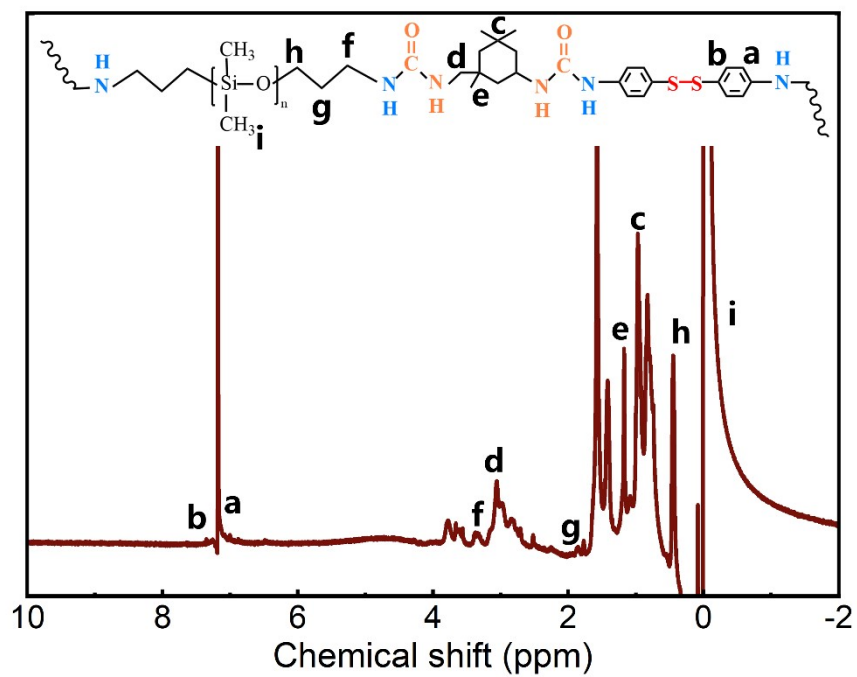

Figure S3. <sup>1</sup>H NMR spectrum of PUSE.

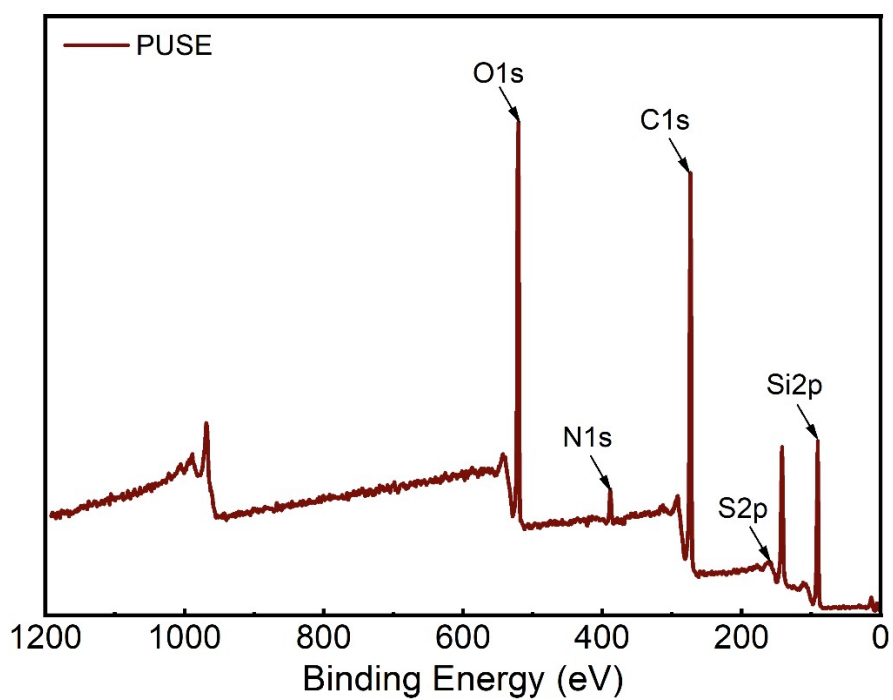

Figure S4. XPS spectrum of PUSE.

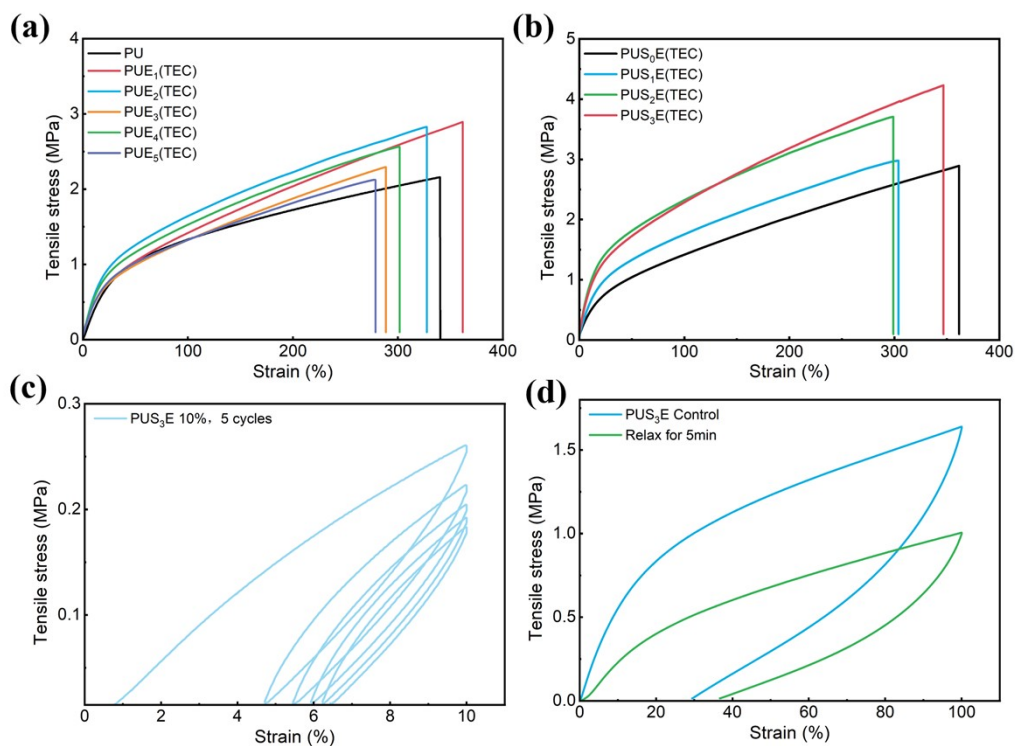

**Figure S5.** (a) Stress-strain curves of  $PUE_x$  elastomers with different TEC contents. (b) Stress-strain curves of  $PUS_xE$  elastomers with different APDS contents. (c) Cyclic loading-unloading tensile curves of the  $PUS_3E$  elastomer for 5 cycles at 10% strain. (d) Cyclic loading-unloading tensile curve of the  $PUS_3E$  elastomer after one cycle at 100% strain and relaxation for 5 minutes.

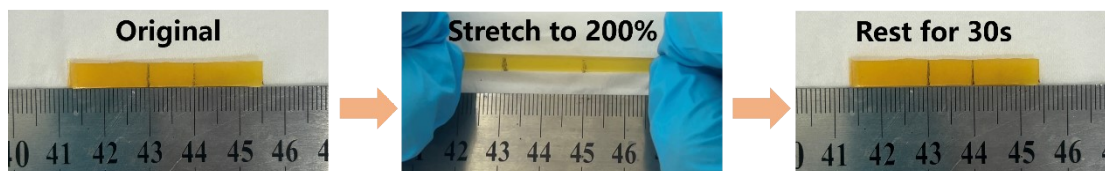

**Figure S6.** Photographs of the original, stretched and recovered  $PUS_3E$ .

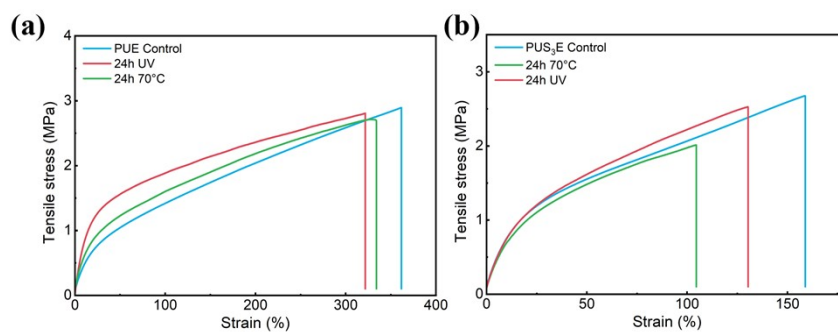

**Figure S7.** (a) Stress-strain curves of PUE elastomer before and after self-healing under different conditions (UV,  $70^\circ\text{C}$ ). (b) Stress-strain curves of  $PUS_3E$  elastomer before and after self-healing under different conditions (UV,  $70^\circ\text{C}$ ).

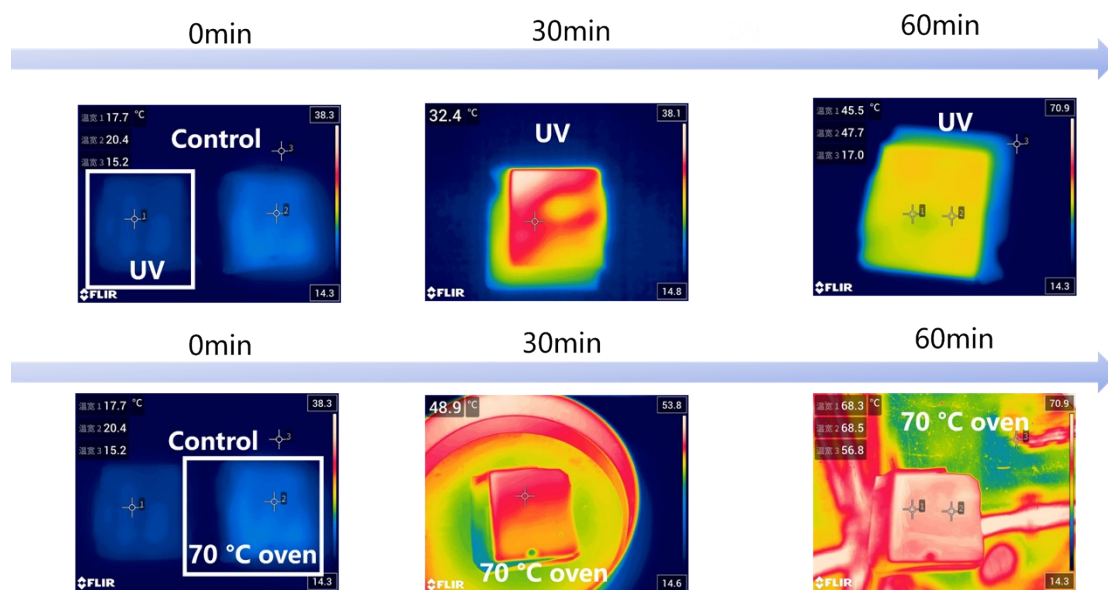

**Figure S8.** The infrared thermal images of the elastomer PUSE under UV irradiation and 70 °C heating conditions, respectively.

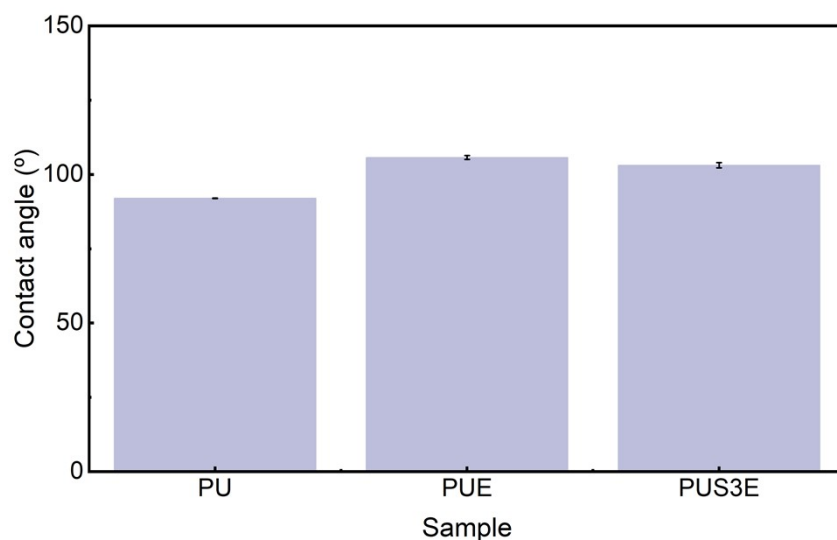

**Figure S9.** The water contact angles of PU, PUE, PUS<sub>3</sub>E

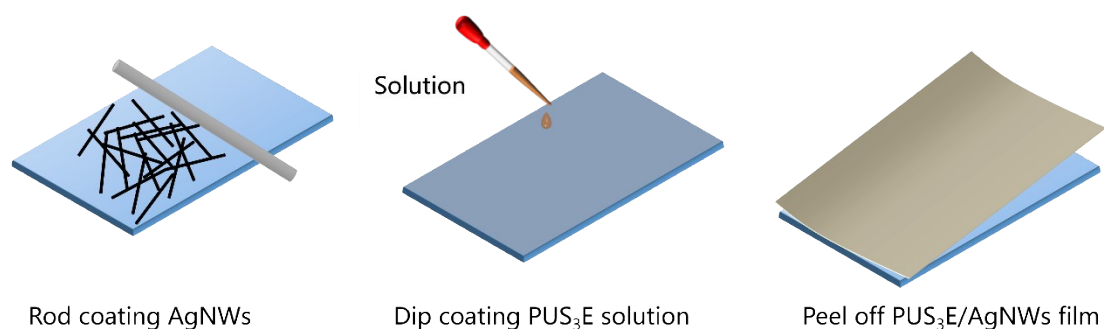

**Figure S10.** Schematic illustration of the fabrication process of the PUS<sub>3</sub>E/AgNWs composite elastomer

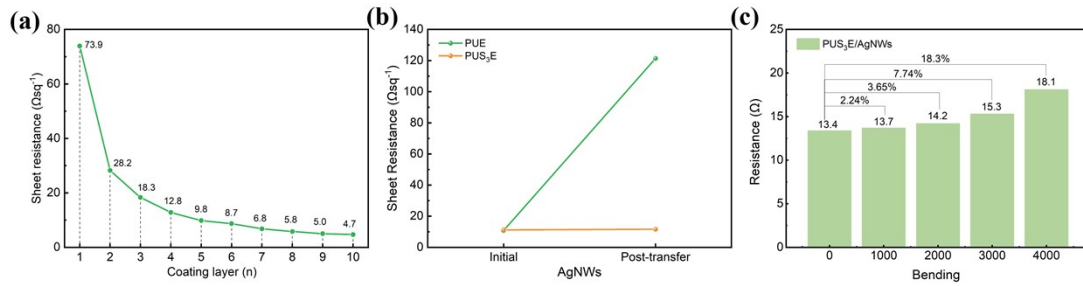

**Figure S11.** (a) Sheet resistance of AgNWs films with different coating layers. (b) Sheet resistance of AgNWs before and after compositing with PUE and PUS<sub>3</sub>E elastomer. (c) Variation of sheet resistance of the PUS<sub>3</sub>E/AgNWs composite conductive film before and after different bending cycles.

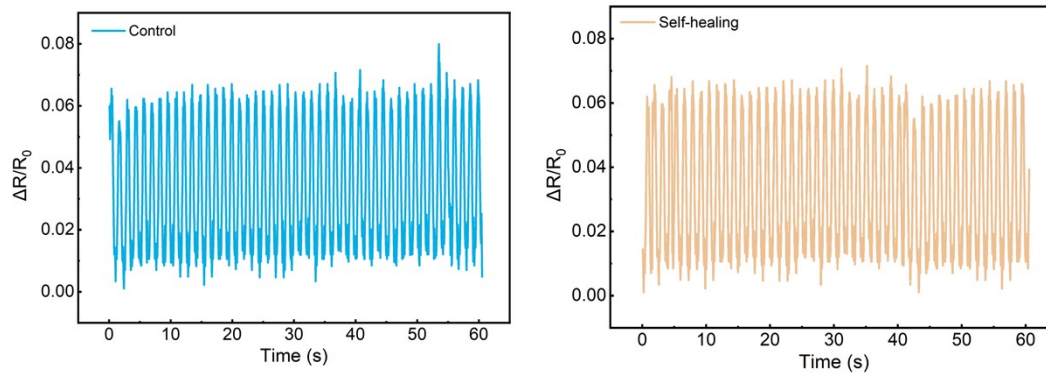

**Figure S12.** Pulse beat signal monitoring of PUS<sub>3</sub>E/AgNWs strain sensors.

**Table S1.** Comparison of PUSE elastomers in the performance of material system, self-healing conditions, self-healing efficiency, tensile stress and toughness of this work with previously reported PDMS-based self-healing polymers.

| Ref.      | Material system                                     | Self-healing conditions | Self-healing Efficiency | Tensile stress | Toughness               |
|-----------|-----------------------------------------------------|-------------------------|-------------------------|----------------|-------------------------|
| [1]       | PDMS/Anthracene-based/photoresponsive segment       | NIR light               | 90%                     | 1.0 MPa        | 5.0 MJ·m <sup>-3</sup>  |
| [2]       | PDMS/IPDI+disulfide/imine-containing chain extender | 25 °C, 24 h             | 88%                     | 1.5 MPa        | 6.0 MJ·m <sup>-3</sup>  |
| [3]       | PDMS/Aromatic urea group                            | 70 °C, 30 min           | 100%                    | 0.87 MPa       | 2.1 MJ·m <sup>-3</sup>  |
| [4]       | PDMS/Aldehyde-based crosslinker                     | 25 °C, 24 h             | 75%                     | 0.57 MPa       | 0.85 MJ·m <sup>-3</sup> |
| [5]       | PDMS/PVMA/aldehyde-modified carbon dots             | UV/2 h                  | 90%                     | 0.9 MPa        | 6.5 MJ·m <sup>-3</sup>  |
| This work | PDMS/TEC/APDS                                       | UV/24h                  | 95%                     | 4.2 MPa        | 9.85 MJ·m <sup>-3</sup> |

- [1] Shi, X. R.; Zhang, K. Y.; Chen, J. X. Octopi Tentacles-Inspired Architecture Enables Self-Healing Conductive Rapid-Photo-Responsive Materials for Soft Multifunctional. *Adv. Funct. Mater.* 2024, 34, 2311567.
- [2] Zeng, W. Y.; Deng, L.J.; Yang, G.; Self-Healable Elastomeric Network with Dynamic Disulfide, Imine, and Hydrogen Bonds for Flexible Strain Sensor. *Chem. Eur. J.* 2023, 29, e202203478.
- [3] Zhang, T. et al. Synergistic Self-Healing Enhancement in Multifunctional Silicone Elastomers. *Polymers* 2024, 16, 487. DOI: 10.3390/polym16040487
- [4] Li, Y. et al. Recyclable and Self-healable Polydimethylsiloxane Elastomers Based on Knoevenagel Condensation. *Chin. J. Polym. Sci.* 2025, 43, 1–10.
- [5] Chen, H.; Li, J.; Zhang, Y.; et al. Photo-responsive self-healing polydimethylsiloxane elastomers based on dynamic imine bonds and carbon dots. *ACS Applied Polymer Materials* 2023, 5(11), 8672–8681.
